other similar pharmacologic responses in the perinatal period, for instance ketamine requirement is much greater in infants under 6 months of age, and Lockhart and Nelson<sup>4</sup> suggested changes in neuronal density, incomplete myelination, or impaired axonal transmission as possible explanations. One may speculate that a common factor relating to neural maturity could explain both the larger local anesthetic dose requirement and the subsequent absence of sympathetic blockade. Dr. Dohi and his group have shed some welcome light on this puzzling feature of spinal anesthesia in the very young.

EVA V. HARNIK, M.D.  
*Department of Anesthesia*  
*Georgetown University Hospital*

Anesthesiology  
65:561, 1986

### Clinical Significance of Perioperative T-wave Inversion

*To the Editor:*—Breslow *et al.*<sup>1</sup> showed that patients with perioperative T-wave changes did not have an increased incidence of adverse cardiac events in the immediate postoperative period. They did not present a long-term follow-up of these patients.

In a 1–2-yr follow-up of patients with unstable angina and new T-wave inversions of > 2 mm, a higher incidence of adverse cardiac events was observed by Haines *et al.*<sup>2</sup> Granborg *et al.*<sup>3</sup> found in a 3-yr follow-up that in patients suspected of acute myocardial infarctions, the number of leads with transient T-wave inversions as well as the sum of negative T-wave amplitudes significantly correlated with the rates of acute myocardial infarctions and death.

In the immediate postoperative period, most cardiac events are not associated with anginal pain. The patient with known or suspected coronary artery disease may have a significant intraoperative ischemic event leading to no externally detectable manifestations other than T-wave inversion.

In the study of Breslow *et al.*,<sup>1</sup> 40 out of 394 patients had known or suspected coronary artery disease. Although not stated in the report, it is likely that few or none of these patients had unstable angina. The incidence of significant ischemic events in the perioperative period under these circumstances is not known, but it is suspected

to be quite low. Nine of 40 patients who had new T-wave abnormalities did not have adverse cardiac events in the perioperative period. If they were to be followed for 2–3 yr, it is possible that they would have higher morbidity and mortality than the remaining 31 patients. In addition, if the sample size had been significantly greater than nine, perioperative ischemic events may also have been detected.

UDAY JAIN, M.D., PH.D.  
*Assistant Professor*  
*Department of Anesthesia*  
*UMDNJ-Robert Wood Johnson Medical School*  
*New Brunswick, New Jersey 08903*

### REFERENCES

1. Breslow MJ, Miller CF, Parker SD, Walman AT, Rogers MC: Changes in T wave morphology following anesthesia and surgery: A common recovery room phenomenon. *ANESTHESIOLOGY* 64:398–402, 1986
2. Haines DE, Raabe DS, Gundel WD, Wackers FJT: Anatomic and prognostic significance of new T wave inversion in unstable angina. *Am J Cardiol* 52:14–18, 1983
3. Granborg J, Grande P, Pedersen A: Diagnostic and prognostic implications of transient isolated negative T waves in suspected acute myocardial infarction. *Am J Cardiol* 57:203–207, 1986

(Accepted for publication July 21, 1986.)

Anesthesiology  
65:561–562, 1986

*In reply:*—Dr. Jain has questioned whether perioperative T-wave abnormalities are associated with late cardiac complications (1–3 yr postoperative). This suggestion is based on data demonstrating a relationship between late

cardiac complications and T-wave abnormalities in patients presenting with acute ischemic events (unstable angina, acute myocardial infarction).

Dr. Jain's comments are correct but not relevant to our

3800 Reservoir Road, N.W.  
Washington, D. C. 20007

### REFERENCES

1. Berkowitz S, Green B: Spinal anesthesia in children. *ANESTHESIOLOGY* 12:376–387, 1951
2. Singler RC: Pediatric regional anesthesia, *Pediatric Anesthesia*. Edited by Gregory GA. New York, Churchill Livingstone, 1983; pp 481–518
3. Abajian C, Mellish RWP, Browne AF, Perkins FM, Lambert DH, Mazuzan JE: Spinal anesthesia for surgery in the high risk infant. *Anesth Analg* 63:359–362, 1984
4. Lockhart CH, Nelson WL: The relationship of ketamine requirement to age in the pediatric patient. *ANESTHESIOLOGY* 40: 507–508, 1974

(Accepted for publication July 21, 1986.)

study. First, we had no patients with unstable angina. Second, the references cited by Dr. Jain do not refer to postoperative T-wave changes. Furthermore, while we have no long-term follow-up of our 71 patients with new postoperative T-wave changes, and it is possible that perioperative T-wave abnormalities due to ischemia may be associated with problems in the future, we believe that most asymptomatic postoperative T-wave abnormalities are not due to myocardial ischemia. This conclusion is based on our observation that the frequency of perioperative T-wave changes is similar in populations with considerably different incidences of coronary artery disease. The non-correlation of T-wave changes and coronary artery disease suggests that the two events are not related. Accordingly, we would not predict an increased incidence of late complications in this group. Dr. Jain also suggests that our population may not have been large enough to detect

perioperative ischemic events. Power analysis indicates an 80% probability that a two-fold difference in incidence in T-wave abnormalities would be found, given the study population size and the observed incidence of T-wave changes.

MICHAEL J. BRESLOW, M.D.

CLAIR F. MILLER, M.D.

STEPHEN D. PARKER, M.D.

A. TERRY WALMAN, M.D.

MARK C. ROGERS, M.D.

*Department of Anesthesiology and Critical Care Medicine  
The Johns Hopkins Hospital  
Baltimore, Maryland 21208*

(Accepted for publication July 21, 1986.)

Anesthesiology  
65:562, 1986

## A Simple Technique for Remote Monitoring of Neuromuscular Blockade

*To the Editor:*—The problem of monitoring neuromuscular blockade during such operations as thyroidectomy, carotid endarterectomy, or other head and neck procedures is a familiar one. Typically, during these operations, the arms of the patient are tucked to the side and the head is inaccessible due to surgical drapes or its inclusion in the operative field.

We wish to describe a technique for remotely monitoring train-of-four responses, using equipment commonly available in the operating room. This technique is simple, reliable, and a single unit can be reused for many cases.

The equipment includes a pressure transducer (we use the disposable Gould® transducer; Model T4812AD), and a 250 ml bag of iv fluid in a soft plastic bag with a macrodrip primary solution administration set. The fluid bag is spiked with the solution administration set as usual, and the male end is attached to the transducer. Then, all air is removed from the bag and the tubing *via* the three-way stopcock. The bag is then placed in the patient's hand and the hand and bag are wrapped securely with a foam elbow pad (alternatively, a roll gauze may be used). Nerve stimulator electrodes are applied over the ulnar nerve at the elbow. At this point, the arm may be tucked at the patient's side in the usual fashion. Motor responses to the ulnar nerve stimulation will be seen as a deflection on the oscilloscope as the intrinsic muscles of the hand contract. If desired, the channel may be zeroed and calibrated, and

a quantification of twitch strength may be estimated by observing the digital readout of the generated pressure. (Of course, the pressure will vary from patient to patient.) It is not likely that extreme accuracy of relative twitch strength can be expected; however, observing the decline in tetanus contraction strength or twitch strength with each pulse in the train-of-four with partial neuromuscular blockade can be of help in judging the need for redosing. In addition, "preload" adjustment (*i.e.*, bag pressure prior to stimulation) can be made by addition or removal of fluid in the bag *via* the stopcock near the transducer to obtain an optimal pressure trace.

STEPHEN B. SMITH, M.D.

*Resident, Anesthesiology*

*College of Medicine*

*University of Oklahoma Health Sciences Center*

*P. O. Box 53188*

*Oklahoma City, Oklahoma 73152*

J. W. GREENAWALT III, M.D.

*Staff Anesthesiologist*

*Baptist Medical Center*

*3400 Northwest Highway*

*Oklahoma City, Oklahoma 73112*

(Accepted for publication July 23, 1986.)
